# Supplementary material for: Gelation processes in the non-stoichiometric polylectrolyte–surfactant complex between κ-carrageenan and dodecyltrimethylammonium chloride in KCl
Source: Royal Society of Chemistry journal article supplement (doi:10.1039/c0sm00663g), 2011-01-01
Supplement: c0sm00663g.pdf [file c0sm00663g.pdf]

**Supplementary Information for  
Gelation processes in the non-stoichiometric polyelectrolyte –  
surfactant complex between  $\kappa$ -carrageenan and  
dodecyltrimethylammonium chloride in KCl**

Authors: A. Rosas-Durazo, J. Hernández, J. Lizardi, I. Higuera-Ciapara, F.M.  
Goycoolea, W. Argüelles-Monol\*

**Turbidity Measurements**

Turbidity measurements were performed at 450nm using a UV/Visible Spectrometer (UNICAM, Mod. UV-540) equipped with a Peltier system for temperature control. Quartz cells (optical path: 1 cm) were used. Firstly the samples were held at 75°C for 30 min, then cooled to 25°C at 0.2°C/min, and afterwards heated up to 75°C at the same heating rate.

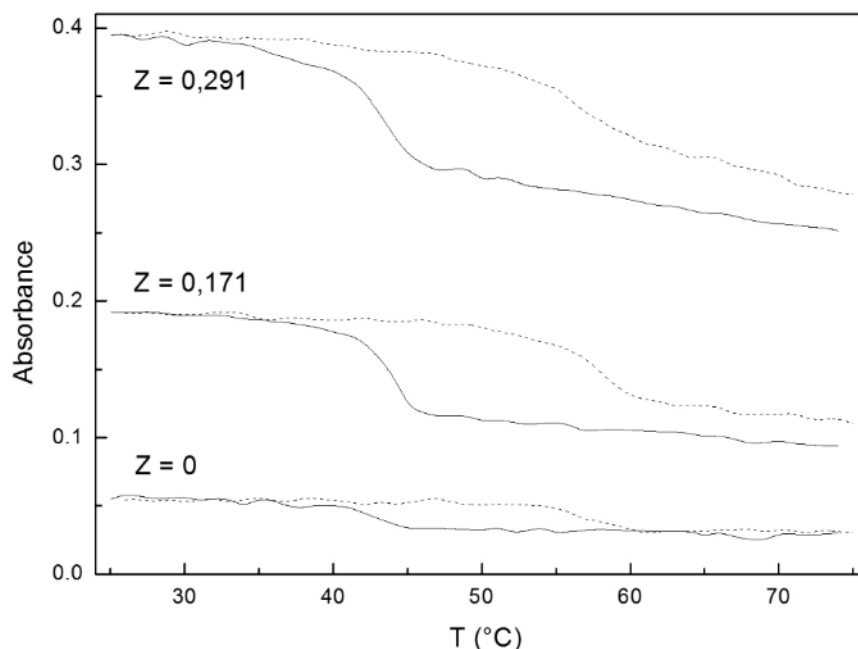

**Figure SI-1.** Dependence of turbidity with temperature on cooling (solid line) and heating (dashed line) processes for 0.5% (w/w)  $\kappa$ -carrageenan/DTAC complexes in 30mM KCl at different compositions as labeled in the figure.

### Optical Rotation

The optical rotation of the stock of  $\kappa$ -carrageenan and PSC solutions were measured in a Perkin Elmer Polarimeter (Mod. 341, 50 Hz), controlled by external circulatory bath. The solutions were loaded to a quartz cell with an optical trajectory of 10 cm,  $\lambda = 365$  nm (Hg lamp) The test consisted of cooling-heating cycle (85-10-85 °C) with isotherms of 10 minutes and a scanning rate of 2 °C..

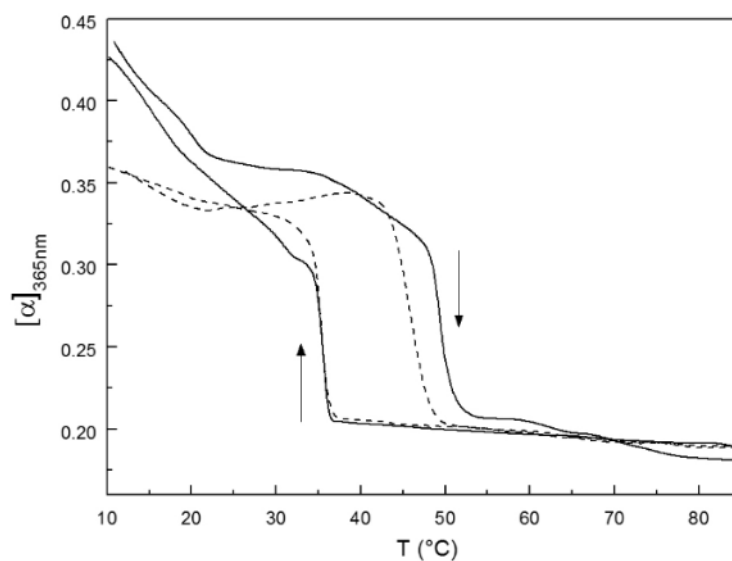

**Figure SI-2.** Dependence of optical rotation with temperature on cooling (up arrow) and heating (down arrow) process for 0.5% (w/w)  $\kappa$ -carrageenan solution ( $Z = 0$ ; dotted line) and a NPSC ( $Z=0.171$ ; solid line) in 30mM KCl.
